# Supplementary material for: A novel and efficient chiral palladium–phosphinooxazolidine catalyst for the enantioselective Diels–Alder reactionElectronic supplementary information (ESI) available: experimental details. See http://www.rsc.org/suppdata/cc/b2/b201625g/
Source: Royal Society of Chemistry journal article supplement (doi:10.1039/b201625g), 2002-04-19
Supplement: b201625g.doc [file b201625g.doc]

### Supplementary data

### Preparation of PdCl2-Phosphinooxathiane complex 4a :

A mixture of POZ **1** (52.6 mg, 0.1 mmol) and PdCl2 (17.7 mg, 0.1 mmol) in dichloromethane was stirred for 72 h at room temperature under Ar. The resulting suspension was filtered, and the filtrate was condensed under a reduced pressure. The residue was recrystallized from hexane : CHCl3 to afford yellow crystals **6a** (66.8 mg, 95 %).

**PdCl2-Phosphinooxazolidine 4a:**

**4a:** 1H NMR (CHCl3)  : 1.24 (m, 1H), 1.62 (m, 1H), 2.02 (m, 1H), 2.44 (m, 1H), 2.87 (m, 1H), 3.56 (m, 1H), 5.71 (s, 1H), 6.35 (t, *J* = 7.6 Hz, 1H), 6.96 (t, *J* = 8.8 Hz, 1H), 7.17-7.53 (m, 18H), 7.67-7.73 (m, 4H), 7.98 (dd, *J* = 3.9 Hz, 7.6 Hz, 1H).

13C NMR (CDCl3)  : 25.56, 31.49, 43.47, 58.84, 74.16, 90.49, 92.35, 124.62, 126.46, 126.53, 127.46, 127.70, 128.23, 128.25, 128.36, 128.48, 128.61, 128.78, 128.90, 129.01, 130.03, 130.10, 131.45, 131.48, 131.81, 131.84, 132.00, 132.03, 133.71, 133.81, 134.98, 135.09, 136.89, 136.99, 141.63, 141.68.

### Preparation of PdCl2-Phosphinooxathiane complex 5 :

A mixture of POZ **1** (52.6 mg, 0.1 mmol) and PdCl2 (17.7 mg, 0.1 mmol) in 1,2-dichloroethane was refluxed for 24 h under Ar. The resulting suspension was filtered, and the filtrate was condensed under reduced pressure. The residue was recrystallized from hexane : CHCl3 to afford yellow crystals **5** (63.3 mg, 90 %).

**5:** 1H NMR (CDCl3)  : 1.44 (m, 1H), 1.88 (m, 1H), 2.08 (m, 1H), 2.62 (m, 1H), 2.92 (m, 1H), 4.41 (m, 1H), 4.95 (s, 1H), 6.84-6.90 (m, 2H), 7.00 (t, *J* = 7.6 Hz, 2H), 7.07-7.19 (m, 6H), 7.22-7.39 (m, 12H), 7.51 (t, *J* = 7.6 Hz, 1H), 7.59 (dd, *J* = 4.4 Hz, 6.6 Hz, 1H), 7.68 (t, *J* = 7.4 Hz, 1H).

13C NMR (CDCl3)  : 27.01, 28.85, 54.97, 89.16, 94.44, 124.88, 126.17, 126.60, 126.74, 127.08, 127.32, 128.04, 128.16, 128.45, 128.54, 128.62, 128.66, 130.68, 130.71, 130.81, 130.84, 132.12, 132.15, 132.19, 132.84, 133.33, 133.44, 133.71, 133.87, 133.98, 135.97, 135.99, 137.26, 137.41, 142.15, 143.53.

**Typical procedure for asymmetric DA reaction (entry 3)**

PdCl2-POZ complex **6c** (25.0 mg, 0.04 mmol) and AgSbF6 (24.4 mg, 0.07 mmol) in CH2Cl2 (1 ml) were stirred at room temperature under Ar for 1 h. The catalyst complex was then cooled to –45°C, and acryloyl-1,3-oxazolidin-2-one **2a** (50.0 mg, 0.36 mmol) in CH2Cl2 (1 ml) followed by cyclopentadiene (150mg, 1.80 mmol) was added. The reaction mixture was stirred for 24 h. The reaction mixture was quenched with sat.NaHCO3 aq. and the mixture was extracted with CHCl3. The organic layer was washed with brine, and dried over MgSO4. Evaporation of the solvent under reduced pressure afforded a crude residue which was purified by preparative TLC (20% ethyl acetate/hexane) to give the cycloadduct **3a** (71.5 mg, 98%).
